# Supplementary material for: Fundamental properties of alkali-intercalated bilayer graphene nanoribbons
Source: Royal Society of Chemistry journal article supplement (doi:10.1039/d3cp02266h), 2023-01-01

## Supporting Information for: Fundamental properties alkali-intercalated bilayer graphene nanoribbons

Thi My Duyen Huynh<sup>1</sup>, Guo-Song Hung<sup>2</sup>, Godfrey Gumbs<sup>3,4</sup>, Ngoc Thanh Thuy Tran<sup>5\*</sup>

<sup>1</sup>Department of Physics, National Cheng Kung University, Tainan 701, Taiwan

<sup>2</sup>Department of Materials Science and Engineering, National Cheng Kung University, Tainan 701, Taiwan

<sup>3</sup>Department of Physics and Astronomy, Hunter College of the City University of New York, New York 10065, United States.

<sup>4</sup>Donostia International Physics Center (DIPC), P de Manuel Lard Izabal, 4, 20018 San Sebastian, Basque Country, Spain.

<sup>5</sup>Hierarchical Green-Energy Materials (Hi-GEM) Research Center, National Cheng Kung University, Tainan 701, Taiwan

\*Email of the corresponding author: [tranntt@phys.ncku.edu.tw](mailto:tranntt@phys.ncku.edu.tw)

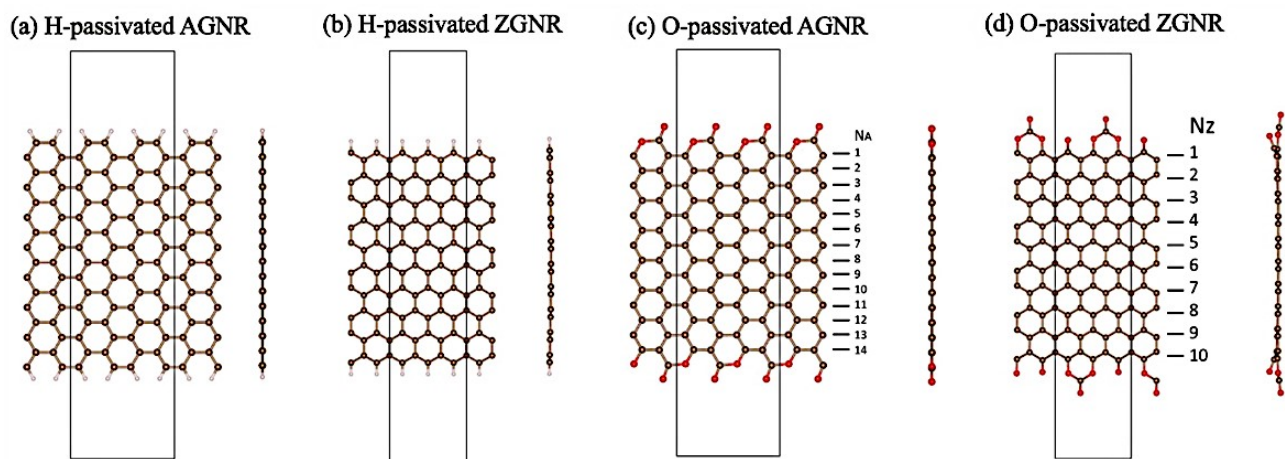

**Fig. S1** The geometry of monolayer H-passivated (a) AGNR, (b) ZGNRs and O-passivated (c) AGNR, (d) ZGNR with the number of dimer lines ( $N_A$ ) and zigzag lines ( $N_Z$ ) are 14 and 10, respectively.

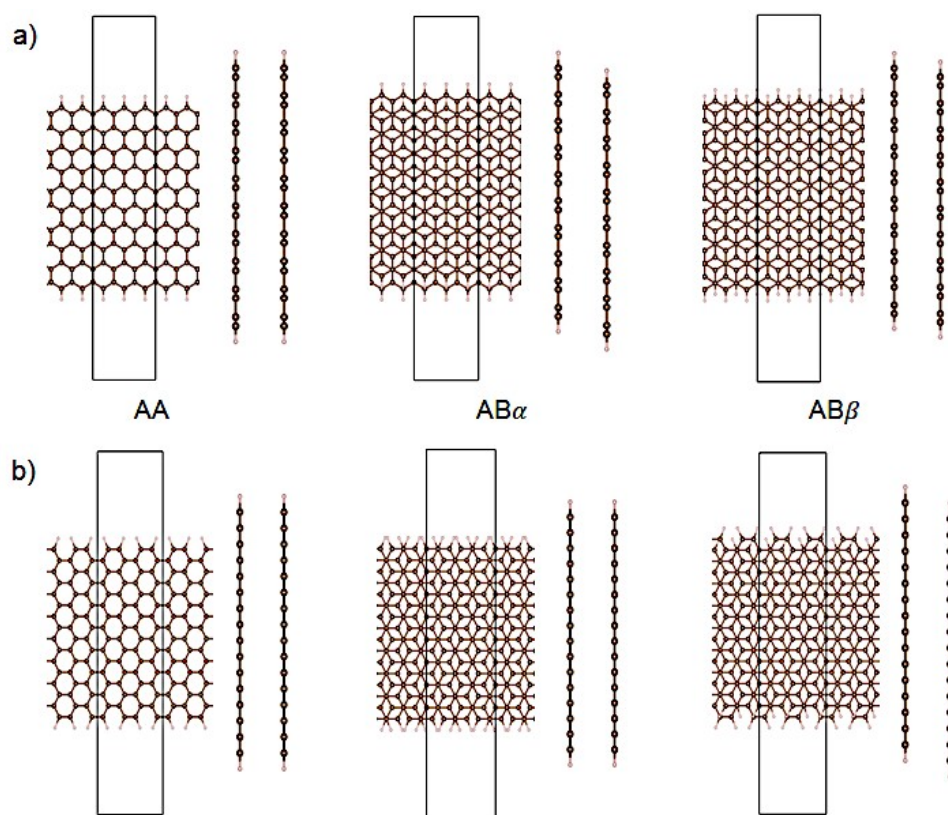

**Fig. S2** Structural bilayer H-passivated (a) ZGNRs and (b) AGNRs in AA,  $AB_\alpha$  and  $AB_\beta$ , respectively.

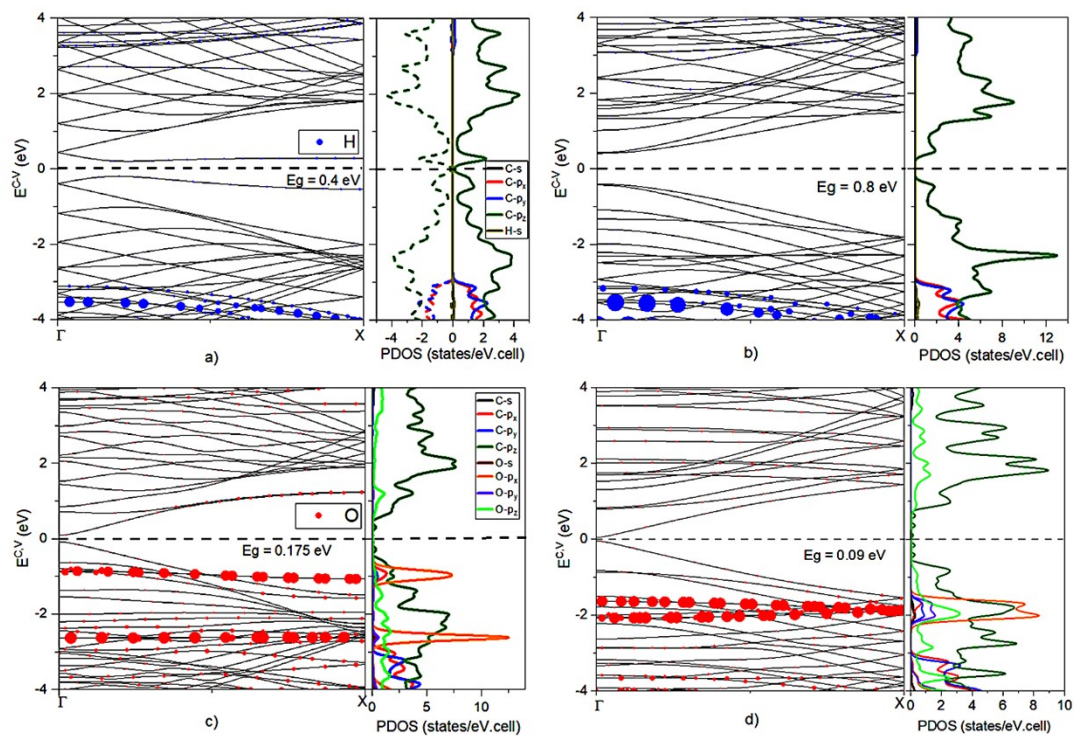

**Fig. S3** Band energy spectra and corresponding orbital-projected DOSs of H-passivated (a) ZGNRs, (b) AGNRs and O-passivated (c) ZGNR, (d) AGNR monolayer. Blue and red circles represent hydrogen and oxygen atoms which dominate the band energy spectra, respectively.

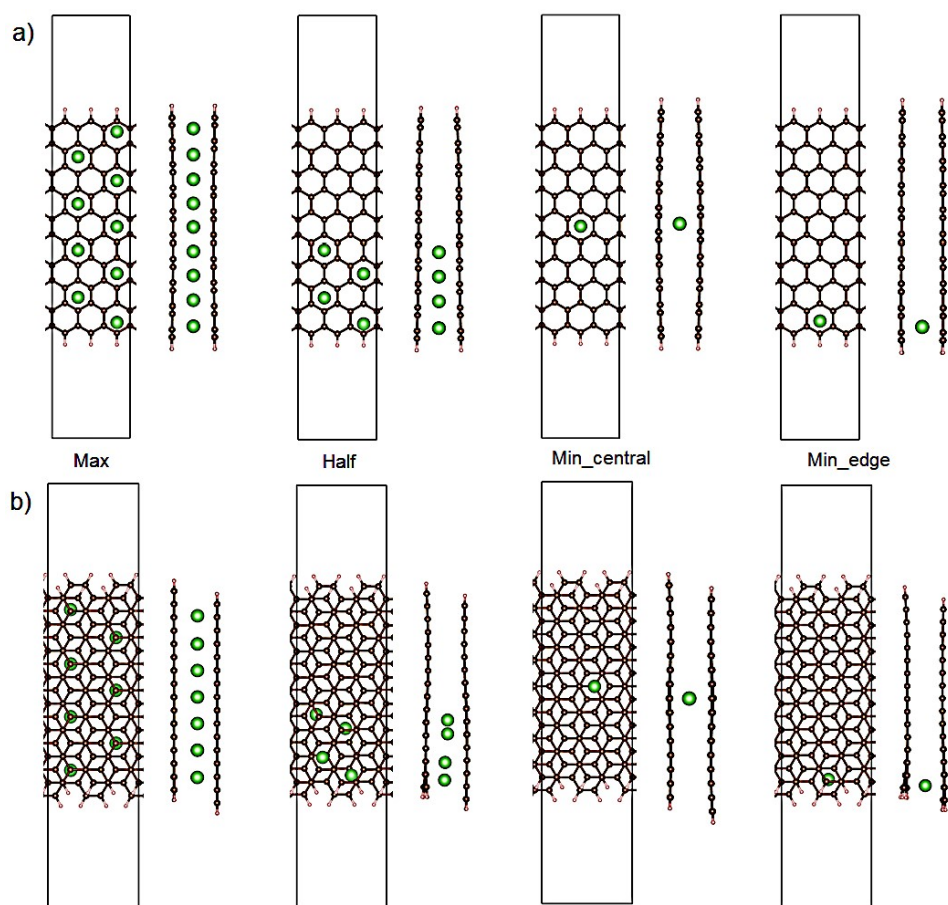

**Fig. S4** Structural optimization of alkali-intercalated GNRs in H-passivated (a) zigzag and (b) armchair edges with different concentrations and intercalated positions.

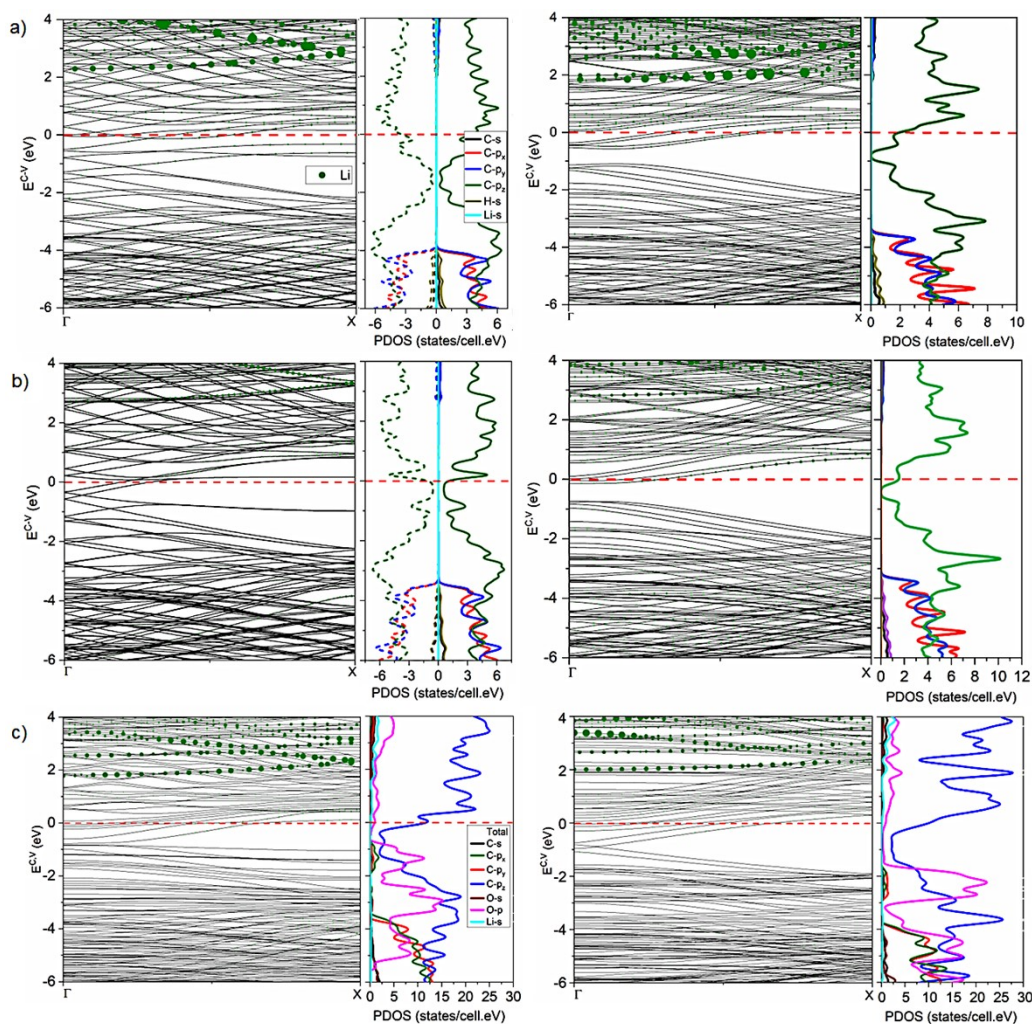

**Fig. S5** Band energy spectra and corresponding orbital-projected DOSs of Li-intercalated bilayer H-ZGNR, H-AGNR in (a) half, (b) min<sub>edge</sub> intercalation, and (c) O-ZGNR, O-AGNR in half intercalation.

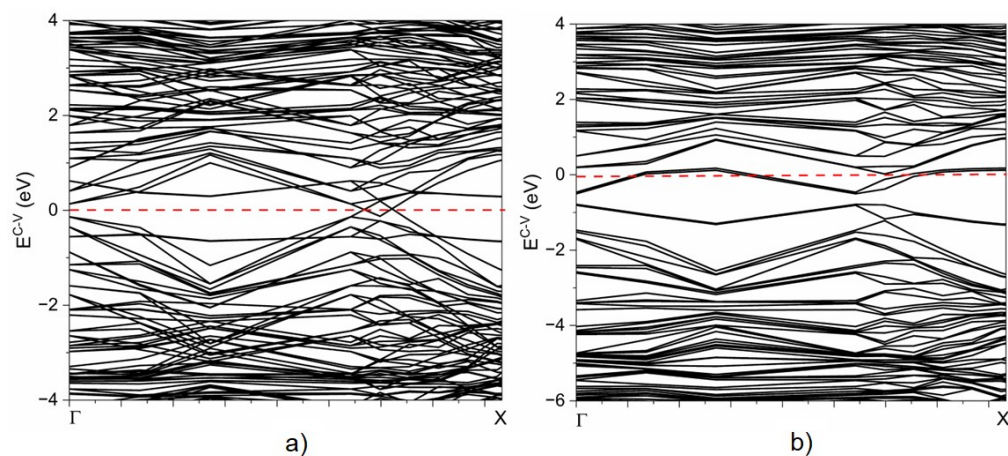

**Fig. S6.** Band energy spectra of a) bilayer H-ZGNR and b) Li-intercalated H-ZGNR in the min<sub>central</sub> case through HSE calculations.

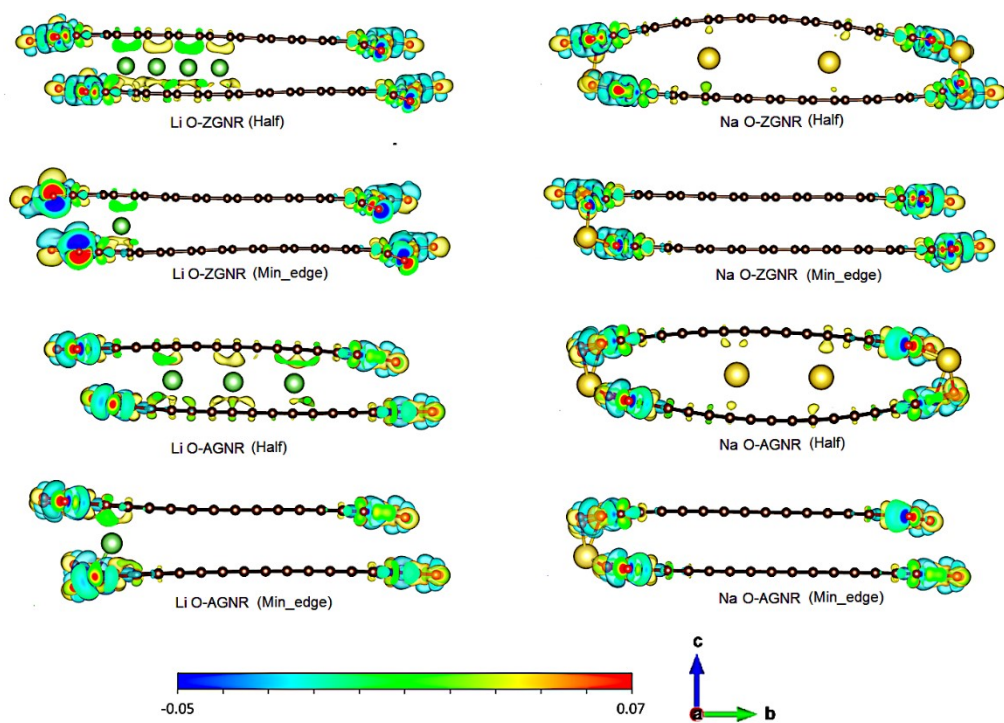

**Fig. S7** The charge density of alkali-intercalated bilayer OGNRs in the half and min\_edge cases.

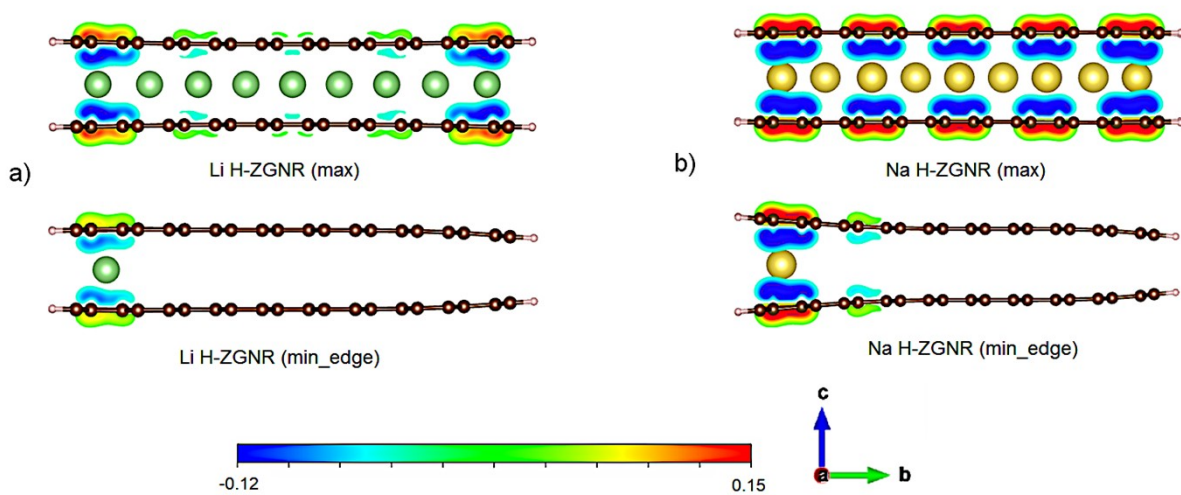

**Fig. S8** The charge density of alkali-intercalated bilayer HGNRs in (a) the max and (b) min\_edge cases.

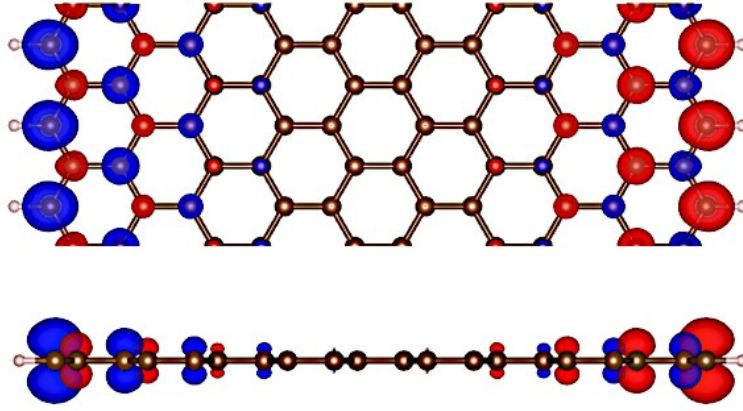

**Fig. S9** Spin distribution of monolayer H-ZGNR.

**Table S1.** The ground state energies (eV) of four types of spin configurations including AFM-AFM, FM-AFM, AFM-FM, and FM-FM in bilayer H-ZGNRs.

|             | AFM-AFM   | FM-AFM    | AFM-FM    | FM-FM     |
|-------------|-----------|-----------|-----------|-----------|
| AA          | -115.827  | -115.8261 | -114.465  | -114.4647 |
| $AB_\alpha$ | -115.8112 | -115.811  | -114.4603 | -114.425  |
| $AB_\beta$  | -115.792  | -115.801  | -114.4678 | -114.4262 |

**Table S2.** The magnetic moment ( $\mu_B$ ) at the edge atom (outermost carbon edge atom), the total magnetic moment in single layer and bilayer GNR-based systems.

| System                    | Edge atom (edge1, edge2)<br>(layer1/layer2) | Single layer<br>(layer1/layer2) | Bilayer | Magnetism<br>(Single layer-<br>Bilayer) |
|---------------------------|---------------------------------------------|---------------------------------|---------|-----------------------------------------|
| 2L-AA (Fig. 9a)           | -0.142, -0.142/0.142, 0.142                 | -0.79/0/79                      | 0       | FM-AFM                                  |
| 2L-AA (Fig. 9b)           | 0.141, -0.141/-0.141,0.141                  | 0/0                             | 0       | AFM-AFM                                 |
| 2L- $AB_\alpha$ (Fig. 9c) | -0.144, -0.144/0.144, 0.144                 | -0.828/0.828                    | 0       | FM-AFM                                  |
| 2L- $AB_\alpha$ (Fig. 9d) | -0.129, 0.129/0.129, -0.129                 | 0/0                             | 0       | AFM-AFM                                 |
| 2L- $AB_\beta$ (Fig. 9e)  | -0.151, -0.151/0.151, 0.151                 | -0.75/0.75                      | 0       | FM-AFM                                  |
| 2L- $AB_\beta$ (Fig. 9f)  | -0.15, 0.15/0.15, -0.15                     | 0/0                             | 0       | AFM-AFM                                 |
| Li HzAA half (Fig. 9g)    | 0.129, -0.02/-0.129,0.02                    | 0.156/-0.156                    | 0       | FM-AFM                                  |
| Li HzAA min_edge (Fig.    | 0.066, 0/0.066, 0                           | 0.217/0.217                     | 0.434   | FM-FM                                   |

9h)

Na HzAA min\_edge  
(Fig. 9i)

0.074, 0/ 0.074, 0

0.238/0.238

0.476

FM-FM

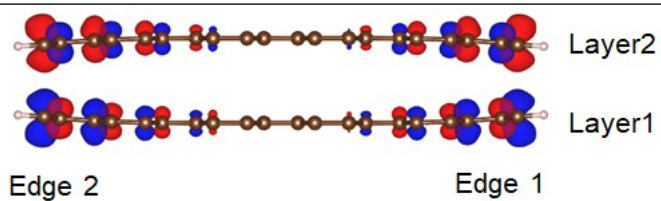

Supplement: d3cp02266h1.pdf [file d3cp02266h1.pdf]
